# Supplementary material
Source: PubMed Central journal article supplement (PMC7532810)
Supplement: mmc1.pdf [file mmc1.pdf]

# **High-resolution structure and biophysical characterization of the nucleocapsid phosphoprotein dimerization domain from the Covid-19 severe acute respiratory syndrome coronavirus 2**

Luca Zinzula <sup>a, \*</sup>, Jerome Basquin <sup>b</sup>, Stefan Bohn <sup>a, c</sup>, Florian Beck <sup>a</sup>, Sven Klumpe <sup>a</sup>, Günter Pfeifer <sup>a</sup>, István Nagy <sup>a</sup>, Andreas Bracher <sup>d</sup>, F. Ulrich Hartl <sup>d</sup>, Wolfgang Baumeister <sup>a, \*</sup>

<sup>a</sup> The Max-Planck Institute of Biochemistry, Department of Molecular Structural Biology, Am Klopferspitz 18, 82152 Martinsried, Germany

<sup>b</sup> The Max-Planck Institute of Biochemistry, Department of Structural Cell Biology, Am Klopferspitz 18, 82152 Martinsried, Germany

<sup>c</sup> The Max-Planck Institute of Biochemistry, Department of Cellular Machines and Signaling, Am Klopferspitz 18, 82152 Martinsried, Germany

<sup>d</sup> The Max-Planck Institute of Biochemistry, Department of Cellular Biochemistry, Am Klopferspitz 18, 82152 Martinsried, Germany

Corresponding authors: [zinzula@biochem.mpg.de](mailto:zinzula@biochem.mpg.de) ; [baumeist@biochem.mpg.de](mailto:baumeist@biochem.mpg.de)

Supplementary Material

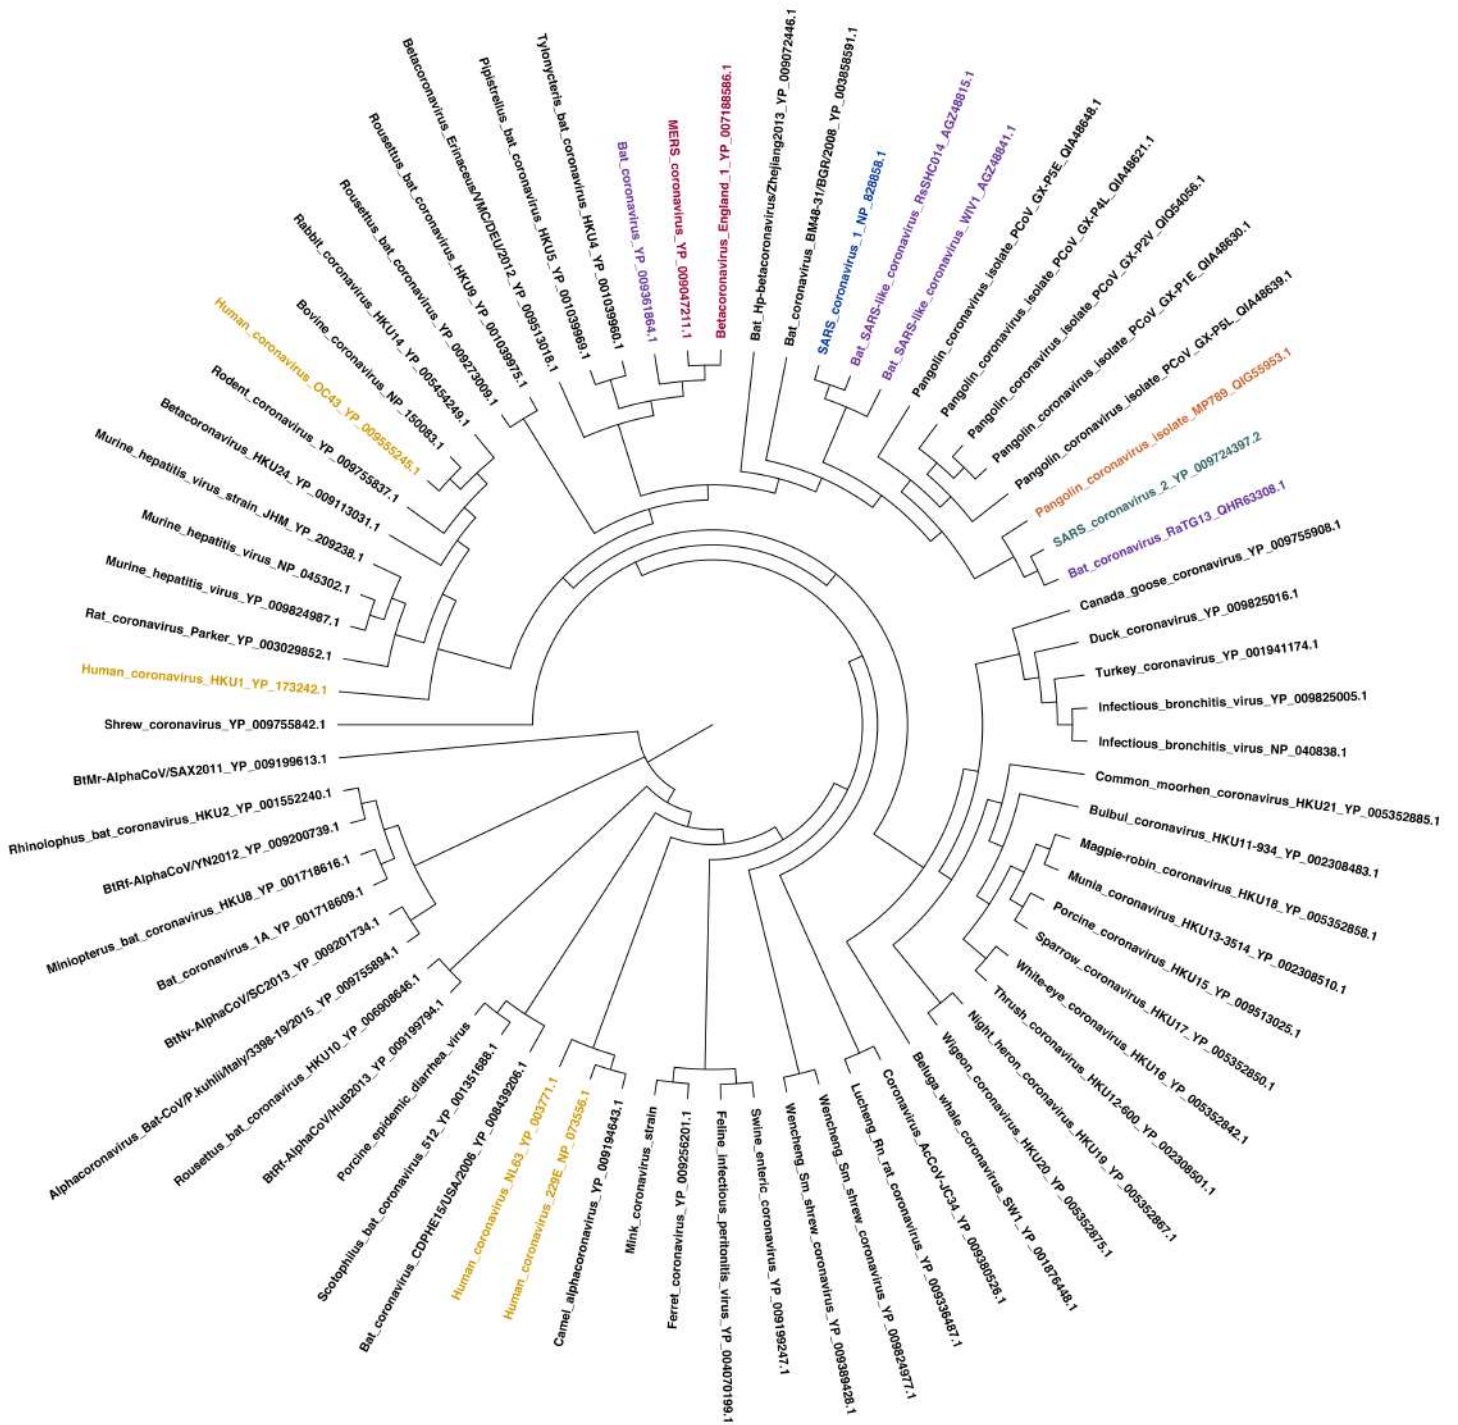

**Fig. S1. Phylogenetic analysis of the SARS-CoV-2 N.** Maximum-likelihood phylogenetic tree of the CoV N protein based on reference sequences from members of the *Coronaviridae* family. Sequences from human CoVs N are highlighted in ochre. Sequences from MERS-CoV, SARS-CoV and SARS-CoV-2 N are highlighted in purple, blue and dark green, respectively. Sequences of closely-related viral species of bat and pangolin origin are highlighted in violet and orange, respectively.

**A**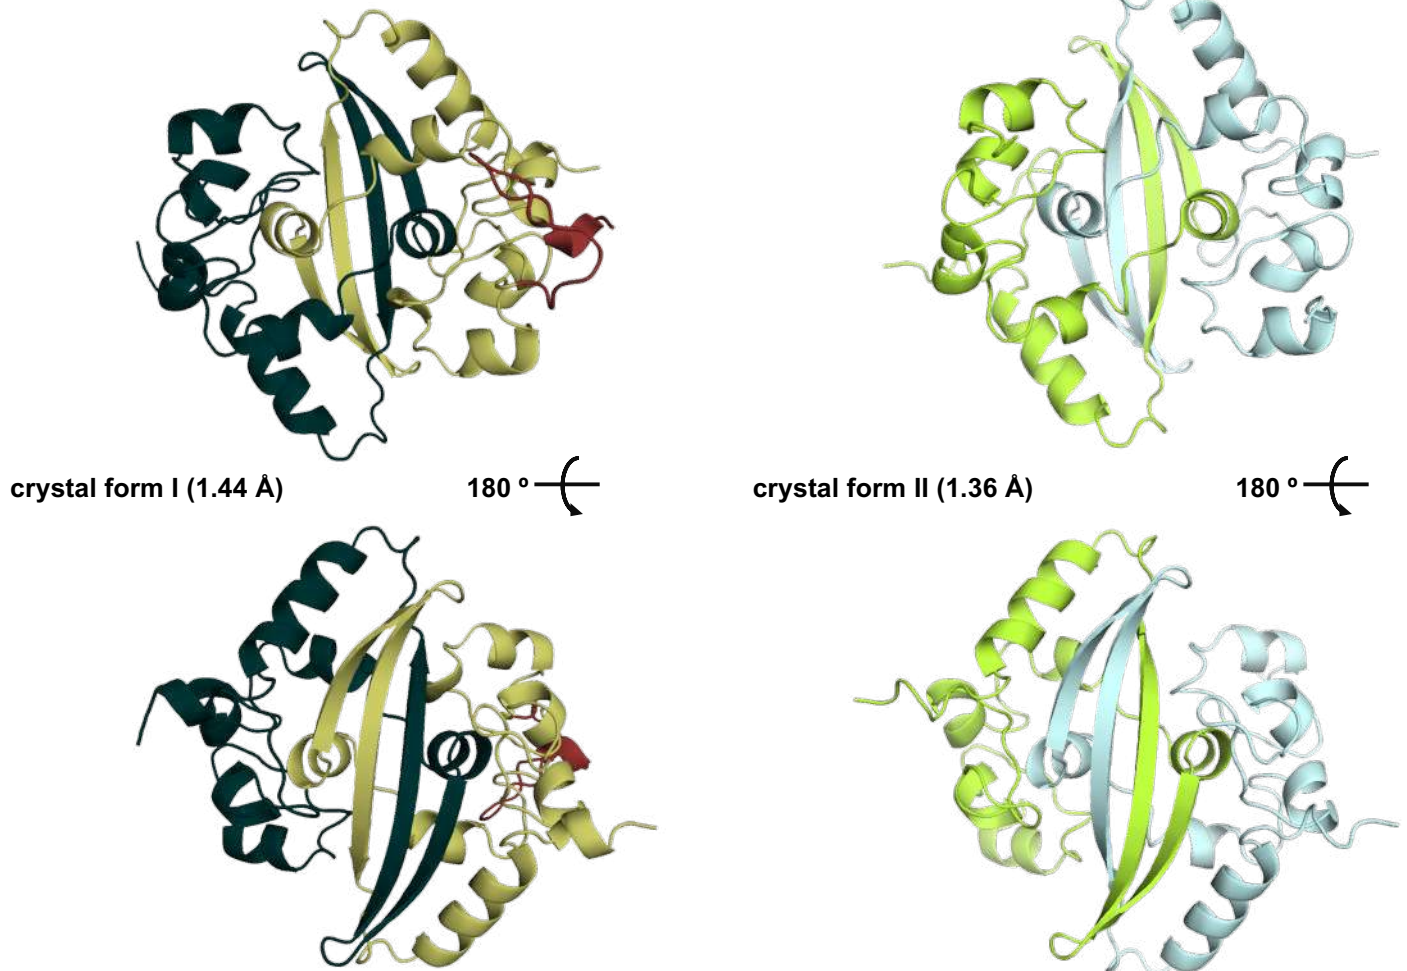**B**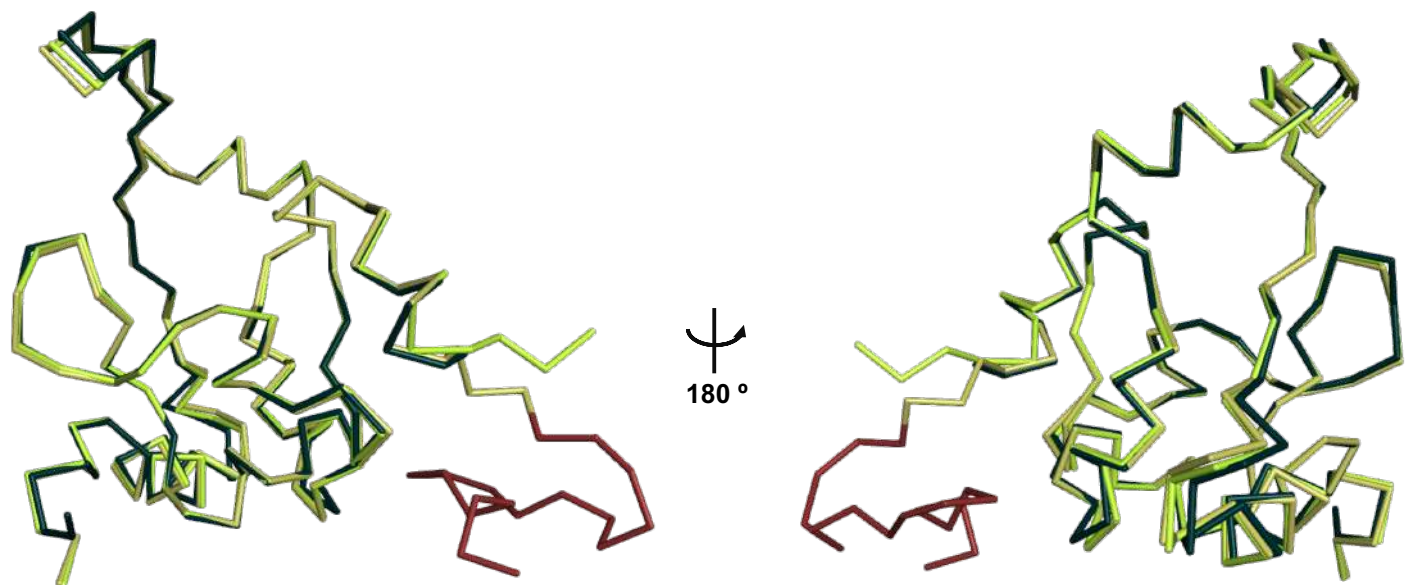

**Fig. S2. Crystal structures of the SARS-CoV-2 N CTD.** (A) Ribbon representation of the SARS-CoV-2 N CTD crystal form I (PDB: 6YUN, left) and crystal form II (PDB: 6ZCO, right). (B) Ca-backbone trace representation of superimposed (r.m.s.d.s.  $\approx 0.3$  Å) SARS-CoV-2 N CTD monomers from crystal forms I (dark and light green) and II (lime). Structured His<sub>6</sub>-tag in crystal form I is highlighted in ruby.



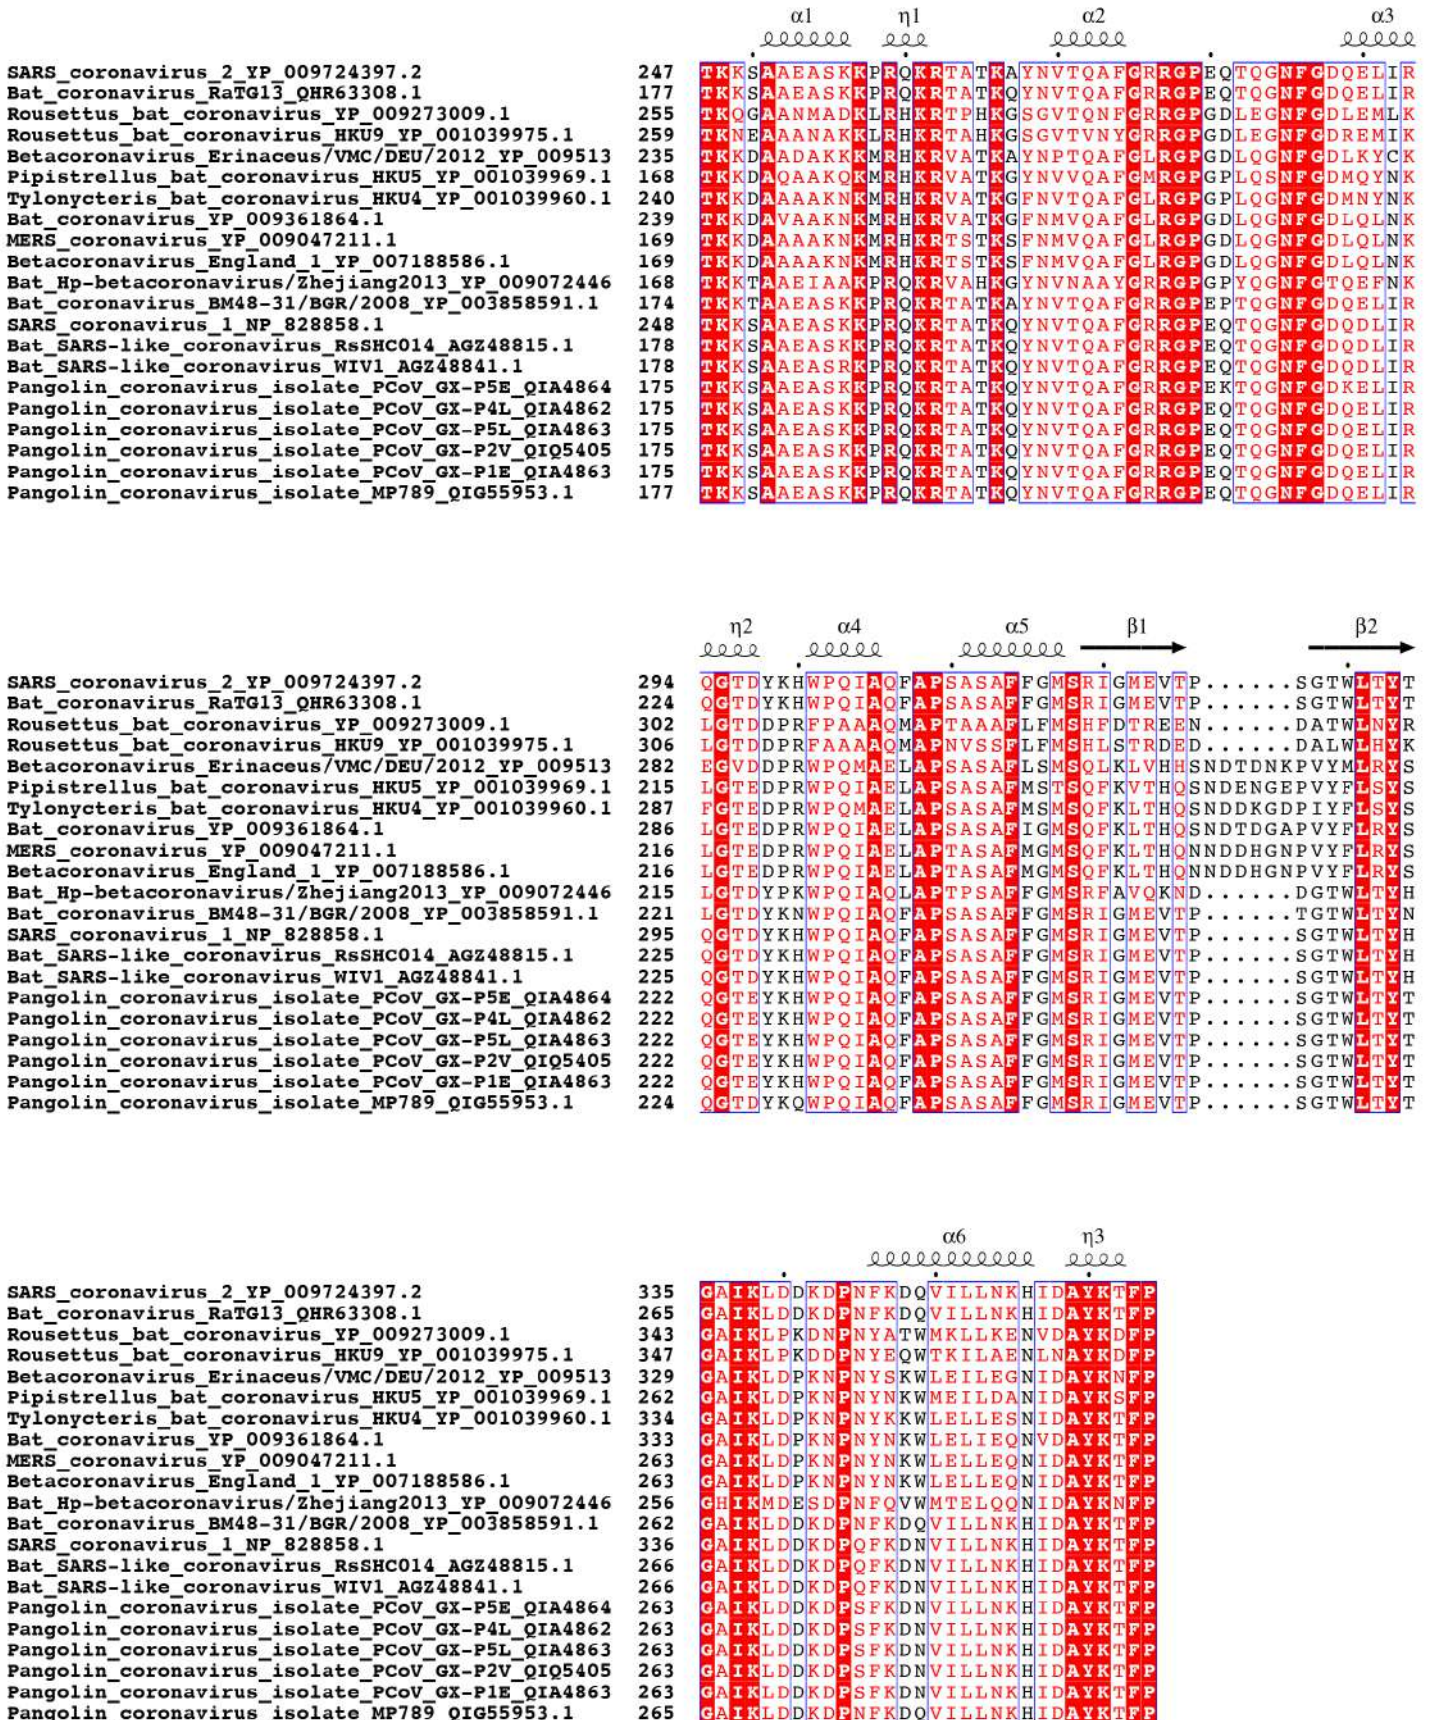

**Fig. S3. Consensus sequences and topological organization of SARS-related CoV N CTD.** Multiple sequence alignment showing the N CTD amino acid consensus among the SARS-related members of the *Sarbecovirus* subgenus of the *Betacoronavirus* genus in the *Coronaviridae* family. Row above the sequence alignment indicates amino acid topological organization relative to the N CTD structure.

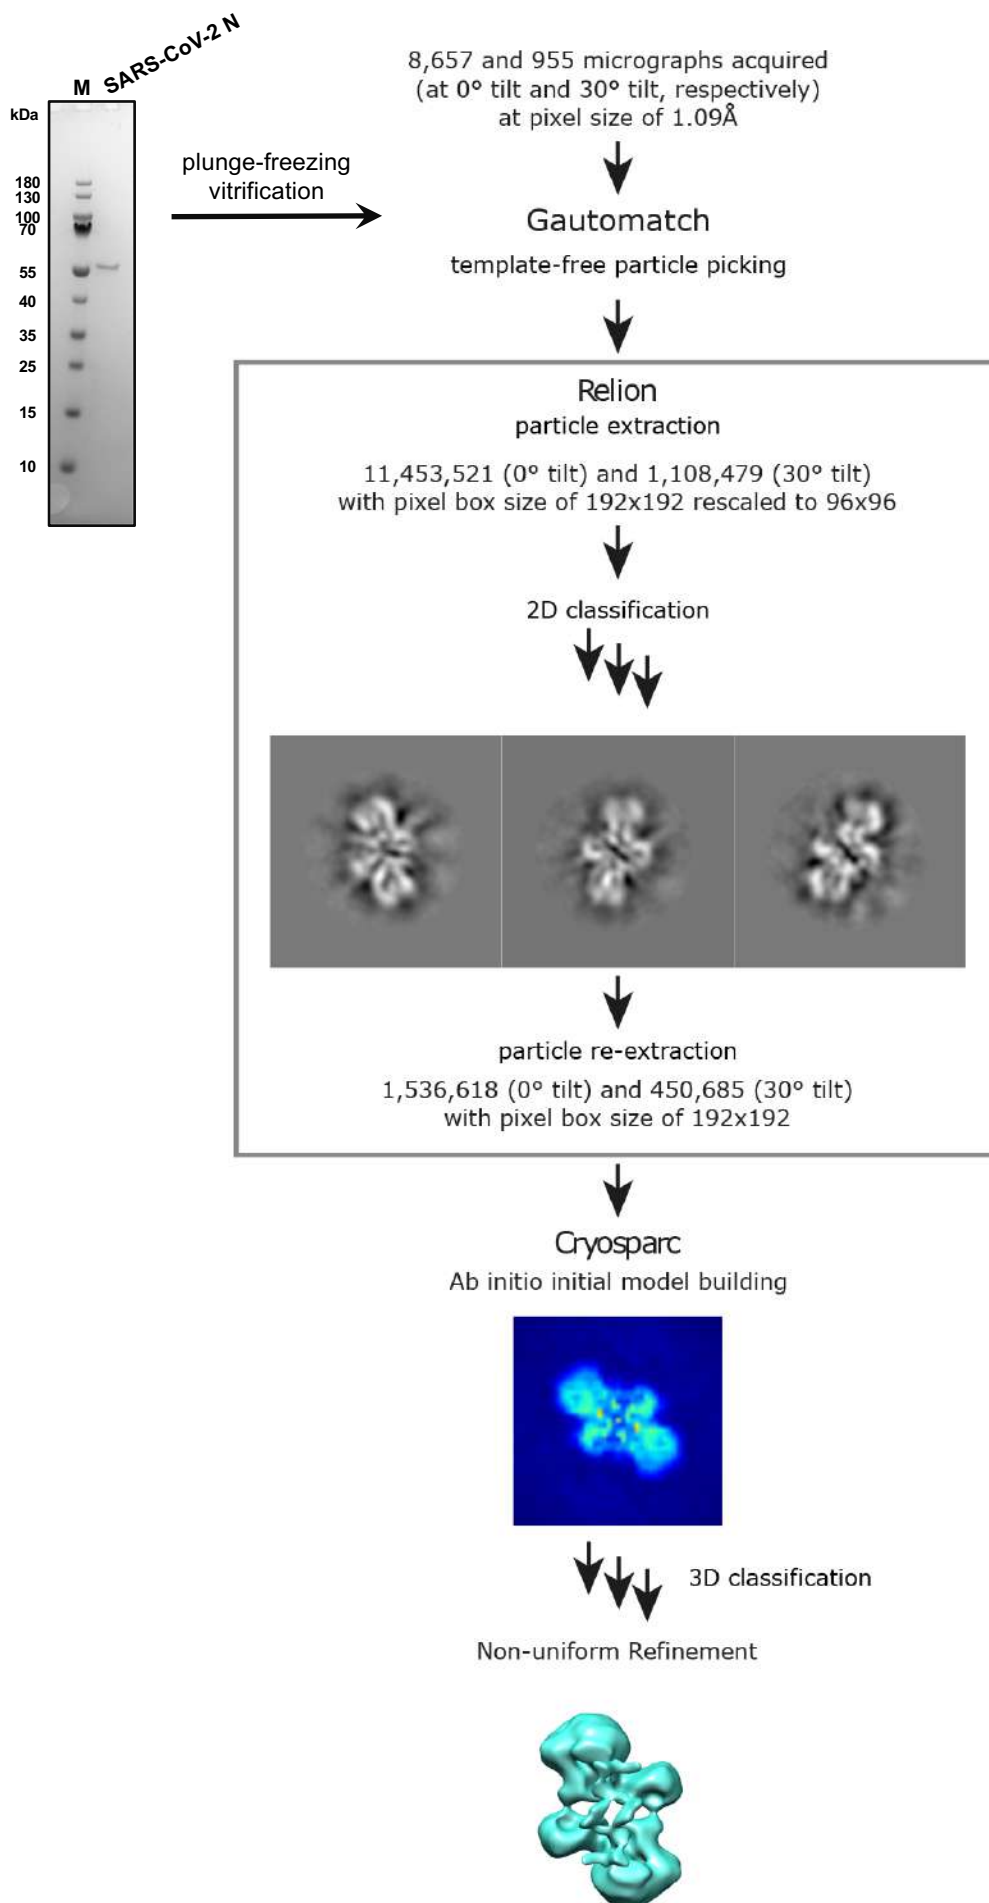

**Fig. S4. Single particle analysis of the SARS-CoV-2 N bound to ssRNA.** Image processing workflow of the cryo-EM dataset of the full-length SARS-CoV-2 N (SDS-PAGE analysis shown in the upper left: M, molecular weight marker) pre-incubated with a heptameric SARS-CoV-2 ssRNA genomic fragment.
